# Supplementary material for: Developing a communication-skills training curriculum for resident-physicians to enhance patient outcomes at an academic medical centre: an ongoing mixed-methods study protocol
Source: HighWire-hosted journal article supplement (doi:10.1136/bmjopen-2021-056840), 2022-08-01
Supplement: bmjopen-2021-056840supp002_data_supplement.pdf [file bmjopen-2021-056840supp002_data_supplement.pdf]

### Qualitative Semi-Structured Interview Guide – Patients

|                                          | Section 1: Exploring Perceptions                                                              | Probes                                                                                                                                                                                                                                                                                                                                                                                                                                                                                                             |
|------------------------------------------|-----------------------------------------------------------------------------------------------|--------------------------------------------------------------------------------------------------------------------------------------------------------------------------------------------------------------------------------------------------------------------------------------------------------------------------------------------------------------------------------------------------------------------------------------------------------------------------------------------------------------------|
| 1.1                                      | What do you think characterizes effective physician-patient communication?                    | <ul style="list-style-type: none"> <li>- On average, how would you appraise the resident doctor's communication skills?</li> <li>- How would you comment on the listening skills of the resident doctor?</li> <li>- Is the resident doctor empathetic while interacting with patients?</li> <li>- Do you think the residents have an appropriate tone while interacting with patients?</li> <li>- Do you think that their body language and eye contact is appropriate while interacting with patients?</li> </ul> |
| Section 2: Difficulties in Communication |                                                                                               |                                                                                                                                                                                                                                                                                                                                                                                                                                                                                                                    |
| 2.1                                      | What kind of doctors do you find it particularly challenging to interact with and why?        | <ul style="list-style-type: none"> <li>- Most difficult interaction you have had?</li> <li>- Have you ever had preconceived ideas about a resident based on their gender or ethnic background?</li> </ul>                                                                                                                                                                                                                                                                                                          |
| 2.2                                      | Do you feel comfortable in asking the resident questions or asking them to repeat themselves? | <ul style="list-style-type: none"> <li>- Is the resident able to adequately explain you the diagnosis/disease prognosis/treatment?</li> <li>- If not, why?</li> </ul>                                                                                                                                                                                                                                                                                                                                              |

|                                      |                                                                                        |                                                                                                                                                                                                                                                                                                                                                                |
|--------------------------------------|----------------------------------------------------------------------------------------|----------------------------------------------------------------------------------------------------------------------------------------------------------------------------------------------------------------------------------------------------------------------------------------------------------------------------------------------------------------|
|                                      |                                                                                        | <ul style="list-style-type: none"> <li>- Do the residents answer your questions patiently?</li> <li>- What is the level of trust you have in your doctor's prescribed disease management strategy?</li> </ul>                                                                                                                                                  |
| 2.3                                  | Has language ever been a barrier in communicating effectively with doctors?            | <ul style="list-style-type: none"> <li>- Do you face difficulty in explaining symptoms to the doctor?</li> <li>- Has the resident's language ever been a barrier in communicating effectively with them?</li> <li>- Does the resident use Urdu/other local language/layman translations of medical terminologies to help you understand the latter?</li> </ul> |
| 2.4                                  | Are resident doctors sensitive while breaking bad news?                                | <ul style="list-style-type: none"> <li>- Do they offer emotional support or counseling during the process?</li> </ul>                                                                                                                                                                                                                                          |
| <b>Section 3: Existing Strengths</b> |                                                                                        |                                                                                                                                                                                                                                                                                                                                                                |
| 3.1                                  | What are the existing strengths in communication of resident doctors?                  | <ul style="list-style-type: none"> <li>- Strengths you might not have seen in doctors elsewhere?</li> </ul>                                                                                                                                                                                                                                                    |
| <b>Section 4: Recommendations</b>    |                                                                                        |                                                                                                                                                                                                                                                                                                                                                                |
| 4.1                                  | What improvements would you like to see in the resident doctors' communication skills? | <ul style="list-style-type: none"> <li>- Which aspects of communication should</li> </ul>                                                                                                                                                                                                                                                                      |

|  |  |                                                    |
|--|--|----------------------------------------------------|
|  |  | doctors focus on and work to improve their skills? |
|--|--|----------------------------------------------------|
