# Supplementary material for: Developing a communication-skills training curriculum for resident-physicians to enhance patient outcomes at an academic medical centre: an ongoing mixed-methods study protocol
Source: HighWire-hosted journal article supplement (doi:10.1136/bmjopen-2021-056840), 2022-08-01
Supplement: bmjopen-2021-056840supp004_data_supplement.pdf [file bmjopen-2021-056840supp004_data_supplement.pdf]

## Patient-Resident Communication Assessment Tool

### Demographics:

**Gender:**        Male                      Female

Age: \_\_\_\_\_

Marital Status:            Single                      Married                      Divorced                      Widowed

Highest Education Level:

Which specialty/service line is the resident in: \_\_\_\_\_

How many times did you interact with the resident: \_\_\_\_\_

On average how long did each interaction last for: \_\_\_\_\_

If admitted, how many days have you been in the hospital for: \_\_\_\_\_

Communication with patients is an integral part of the delivery of medical care. We would like to know how you feel about the way the doctor communicated with you.

**1 = Poor, 2 = Fair, 3 = Good, 4 = Very Good, 5 = Excellent**

- |                                                            |                   |
|------------------------------------------------------------|-------------------|
| 1. Greeted me in a way that made me feel comfortable       | 1   2   3   4   5 |
| 2. Treated me with respect                                 | 1   2   3   4   5 |
| 3. Showed interest in my ideas about my health             | 1   2   3   4   5 |
| 4. Understood my main health concerns                      | 1   2   3   4   5 |
| 5. Paid attention to me (looked at me, listened carefully) | 1   2   3   4   5 |
| 6. Let me talk without interruption                        | 1   2   3   4   5 |
| 7. Gave me as much information as I wanted                 | 1   2   3   4   5 |
| 8. Talked in terms I could understand                      | 1   2   3   4   5 |
| 9. Checked to be sure I understood everything              | 1   2   3   4   5 |
| 10. Encouraged me to ask questions                         | 1   2   3   4   5 |
| 11. Involved me in decisions as much as I wanted           | 1   2   3   4   5 |

|                                                         |          |          |          |          |          |
|---------------------------------------------------------|----------|----------|----------|----------|----------|
| 12. Discussed next steps, including any follow-up plans | <b>1</b> | <b>2</b> | <b>3</b> | <b>4</b> | <b>5</b> |
| 13. Showed care and concern                             | <b>1</b> | <b>2</b> | <b>3</b> | <b>4</b> | <b>5</b> |
| 14. Spent the right amount of time with me              | <b>1</b> | <b>2</b> | <b>3</b> | <b>4</b> | <b>5</b> |
| <b><u>The Doctor's Staff</u></b>                        |          |          |          |          |          |
| 15. Treated me with respect                             | <b>1</b> | <b>2</b> | <b>3</b> | <b>4</b> | <b>5</b> |
